# Supplementary material for: Evaluation of extraction kits and RT-qPCR systems adapted to high-throughput platform for circulating miRNAs
Source: PubMed Central journal article supplement (PMC4371102; doi:10.1038/srep09430), 2015-03-24
Supplement: srep09430-s1.pdf [file srep09430-s1.pdf]

Evaluation of extraction kits and RT-qPCR systems adapted to high-throughput platform for circulating miRNAs.

Geok Wee Tan, Alan Soo Beng Khoo, Lu Ping Tan

**Supplementary Table S1.** ICC (two-way mixed model with consistency) of different extraction kits evaluated by the TaqMan system.<sup>a</sup>

|    | Q                     |                    | E                     |                    | A                     |                    | MN                    |                    |
|----|-----------------------|--------------------|-----------------------|--------------------|-----------------------|--------------------|-----------------------|--------------------|
|    | without normalisation | with normalisation | without normalisation | with normalisation | without normalisation | with normalisation | without normalisation | with normalisation |
| E  | 0.808***              | 0.892***           |                       |                    |                       |                    |                       |                    |
| A  | 0.927***              | 0.904***           | 0.875***              | 0.991***           |                       |                    |                       |                    |
| MN | 0.972***              | 0.969***           | 0.784***              | 0.876***           | 0.905**               | 0.880***           |                       |                    |
| NB | 0.708***              | 0.868***           | 0.602***              | 0.811***           | 0.760**               | 0.826**            | 0.722**               | 0.874***           |

Q, miRNeasy Serum/Plasma Kit; E, miRCURY™ RNA Isolation Kit - Biofluids; A, mirVana™ PARIS™ Kit; MN, NucleoSpin® miRNA Plasma; NB, Plasma/Serum Circulating RNA Purification Kit

<sup>a</sup>Data correspond to Figure 3

\*\*\*p<0.001

\*\*p<0.01

**Supplementary Table S2.** ICC (two-way mixed model with consistency) of different extraction kits evaluated by the miScript system.<sup>a</sup>

|    | Q                     |                    | E                     |                    | A                     |                    | MN                    |                    |
|----|-----------------------|--------------------|-----------------------|--------------------|-----------------------|--------------------|-----------------------|--------------------|
|    | without normalisation | with normalisation | without normalisation | with normalisation | without normalisation | with normalisation | without normalisation | with normalisation |
| E  | 0.463**               | 0.568***           |                       |                    |                       |                    |                       |                    |
| A  | 0.386**               | 0.463**            | 0.621***              | 0.733***           |                       |                    |                       |                    |
| MN | 0.337**               | 0.439**            | 0.461**               | 0.657***           | 0.801***              | 0.787***           |                       |                    |
| NB | 0.255 <sup>ns</sup>   | 0.418**            | 0.293*                | 0.435**            | NA                    | 0.438**            | 0.456***              | 0.572***           |

Q, miRNeasy Serum/Plasma Kit; E, miRCURY™ RNA Isolation Kit - Biofluids; A, mirVana™ PARIS™ Kit; MN, NucleoSpin® miRNA Plasma; NB, Plasma/Serum Circulating RNA Purification Kit

<sup>a</sup>Data correspond to Supplementary Figure 1

\*\*\*p<0.001

\*\*p<0.01

\*p<0.05

ns, not significant

NA, not available

**Supplementary Table S3.** Assays evaluated, analysed or excluded from analysis in different RT-qPCR systems adapted to the high-throughput platform.

| miRNAs            | RT-qPCR system      |         |          |                     |
|-------------------|---------------------|---------|----------|---------------------|
|                   | TaqMan <sup>1</sup> | miRCURY | miScript | TaqMan <sup>2</sup> |
| cel-miR-39        | I                   | FMCA    | I        | I                   |
| cel-miR-54        | I                   | FMCA    | I        | I                   |
| hsa-let-7a        | I                   | FMCA    | FMCA     | NP                  |
| hsa-miR-135a*     | NSA                 | FMCA    | NSA      | NSA                 |
| hsa-miR-141       | NA                  | FMCA    | NA       | NP                  |
| hsa-miR-150       | I                   | FMCA    | I        | NP                  |
| hsa-miR-155       | NA                  | FMCA    | I        | I                   |
| hsa-miR-16        | I                   | FMCA    | I        | I                   |
| hsa-miR-17        | I                   | FMCA    | I        | I                   |
| hsa-miR-200a      | NP                  | NP      | NP       | NA                  |
| hsa-miR-200b      | NA                  | FMCA    | NA       | NP                  |
| hsa-miR-203       | NP                  | NP      | NP       | NA                  |
| hsa-miR-20a       | I                   | FMCA    | I        | I                   |
| hsa-miR-20b       | I                   | FMCA    | I        | I                   |
| hsa-miR-21        | NP                  | NP      | NP       | I                   |
| hsa-miR-223       | I                   | FMCA    | I        | I                   |
| hsa-miR-29c       | I                   | FMCA    | I        | I                   |
| hsa-miR-30e       | I                   | FMCA    | I        | I                   |
| ebv-miR-BART11-3p | NP                  | NP      | NP       | NA                  |
| ebv-miR-BART14    | NP                  | NP      | NP       | NA                  |
| ebv-miR-BART14#   | NP                  | NP      | NP       | NA                  |
| ebv-miR-BART15    | NP                  | NP      | NP       | NA                  |
| ebv-miR-BART1-5p  | NP                  | NP      | NP       | NA                  |
| ebv-miR-BART16    | NP                  | NP      | NP       | NA                  |
| ebv-miR-BART18-5p | NP                  | NP      | NP       | NA                  |
| ebv-miR-BART19-3p | NP                  | NP      | NP       | NA                  |
| ebv-miR-BART2     | NP                  | NP      | NP       | NA                  |
| ebv-miR-BART22    | NP                  | NP      | NP       | NA                  |
| ebv-miR-BART4     | NP                  | NP      | NP       | NA                  |
| ebv-miR-BART5     | NP                  | NP      | NP       | NA                  |
| ebv-miR-BART6     | NP                  | NP      | NP       | NA                  |
| ebv-miR-BART6-5p  | NP                  | NP      | NP       | NA                  |
| ebv-miR-BART7     | NA                  | FMCA    | NA       | NA                  |
| ebv-miR-BART8     | NP                  | NP      | NP       | NA                  |
| ebv-miR-BART8#    | NP                  | NP      | NP       | NA                  |
| ebv-miR-BART9     | NP                  | NP      | NP       | NA                  |

<sup>1</sup>TaqMan assays performed for evaluation of extraction kits and RT-qPCR systems; <sup>2</sup>TaqMan assays performed for evaluation of plasma (collected at different time points) and serum; NP, not performed; I, Included in analysis; FMCA, Excluded in analysis due to fail melt-curve; NSA, Excluded in analysis due to non-linear amplification in positive controls or non-specific amplification in negative controls or both; NA, Excluded in analysis due to no amplification in >50% of samples.

**Supplementary Table S4.** Intraclass correlation coefficient (ICC) using two-way mixed model with absolute agreement for RT and qPCR replicates.

|          | RT                    |                    | qPCR                  |                    |
|----------|-----------------------|--------------------|-----------------------|--------------------|
|          | without normalisation | with normalisation | without normalisation | with normalisation |
| TaqMan   | 0.970***              | 0.971***           | 0.977***              | NP                 |
| miScript | 0.078 <sup>ns</sup>   | 0.712***           | 0.996**               | NP                 |

\*\*\*p<0.001

ns, not significant

NP, not performed.

**Supplementary Table S5.** Serial dilutions of standard curve and titration of pooled cell lines.

|                                                 | <b>Point</b> | <b>Dilution fold (log<sub>2</sub>)</b> | <b>Concentration (g/μl)</b> |
|-------------------------------------------------|--------------|----------------------------------------|-----------------------------|
| <b>Standard Curve</b>                           | s1           | 0.0                                    | $2.5 \times 10^{-12}$       |
|                                                 | s1a          | -0.3                                   | $2.0 \times 10^{-12}$       |
|                                                 | s2           | -3.0                                   | $3.1 \times 10^{-13}$       |
|                                                 | s3           | -6.0                                   | $3.9 \times 10^{-14}$       |
|                                                 | s4           | -9.0                                   | $4.9 \times 10^{-15}$       |
|                                                 | s5           | -11.0                                  | $1.2 \times 10^{-15}$       |
|                                                 | s6           | -13.0                                  | $3.1 \times 10^{-16}$       |
|                                                 | s7           | -14.0                                  | $1.5 \times 10^{-16}$       |
| <b>Pooled cell line RNA for TaqMan assays</b>   | t1           | 0.0                                    | $2.0 \times 10^{-7}$        |
|                                                 | t2           | -3.0                                   | $2.5 \times 10^{-8}$        |
|                                                 | t3           | -6.0                                   | $3.1 \times 10^{-9}$        |
|                                                 | t4           | -8.0                                   | $7.8 \times 10^{-10}$       |
|                                                 | t5           | -10.0                                  | $2.0 \times 10^{-10}$       |
|                                                 | t6           | -12.0                                  | $4.9 \times 10^{-11}$       |
|                                                 | t7           | -14.0                                  | $1.2 \times 10^{-11}$       |
|                                                 | PC1          | 0.0                                    | $2.0 \times 10^{-7}$        |
|                                                 | PC2          | -3.3                                   | $2.0 \times 10^{-8}$        |
|                                                 | PC3          | -6.6                                   | $2.0 \times 10^{-9}$        |
|                                                 | PC4          | -10.0                                  | $2.0 \times 10^{-10}$       |
|                                                 | PC5          | -13.3                                  | $2.0 \times 10^{-11}$       |
|                                                 | PC6          | -16.3                                  | $2.5 \times 10^{-12}$       |
|                                                 | PC7          | -18.3                                  | $6.3 \times 10^{-13}$       |
| <b>Pooled cell line RNA for miScript assays</b> | t1           | 0.0                                    | $2 \times 10^{-7}$          |
|                                                 | t2           | -3.3                                   | $2 \times 10^{-8}$          |
|                                                 | t3           | -6.6                                   | $2 \times 10^{-9}$          |
|                                                 | t4           | -10.0                                  | $2.0 \times 10^{-10}$       |
|                                                 | t5           | -13.3                                  | $2.0 \times 10^{-11}$       |
|                                                 | t6           | -15.3                                  | $5.0 \times 10^{-12}$       |
|                                                 | t7           | -17.3                                  | $1.3 \times 10^{-12}$       |

t1-t7 were titration points used in all experiments except for PC1-PC7 which were used in experiments for Figure 5.

**Supplementary Table S6.** Comparison of new and old version of Plasma/Serum Circulating RNA Purification Kit (NB) extraction kits against all other extraction kits on TaqMan and miScript qPCR systems as shown by ICC.

|    | miScript              |          |                    |          | TaqMan                |          |                    |          |
|----|-----------------------|----------|--------------------|----------|-----------------------|----------|--------------------|----------|
|    | without normalisation |          | with normalisation |          | without normalisation |          | with normalisation |          |
|    | NB                    | NBR      | NB                 | NBR      | NB                    | NBR      | NB                 | NBR      |
| Q  | 0.589**               | 0.425*   | 0.382ns            | 0.498*   | 0.730***              | 0.839*** | 0.747***           | 0.828*** |
| E  | 0.500**               | 0.674*** | 0.470*             | 0.662**  | 0.749***              | 0.865*** | 0.839***           | 0.933*** |
| A  | 0.020 <sup>ns</sup>   | 0.711*** | 0.540**            | 0.750*** | 0.760***              | 0.927*** | 0.840***           | 0.929*** |
| MN | 0.247 <sup>ns</sup>   | 0.696*** | 0.352*             | 0.714*** | 0.764***              | 0.832*** | 0.830***           | 0.833*** |

Q, miRNeasy Serum/Plasma Kit; E, miRCURY™ RNA Isolation Kit - Biofluids; A, mirVana™ PARIS™ Kit; MN, NucleoSpin® miRNA Plasma; NB, Plasma/Serum Circulating RNA Purification Kit (older version); NBR, Plasma/Serum Circulating RNA Purification Kit (newer version).

\*\*\*p<0.001

\*\*p<0.01

\*p<0.05

ns, not significant

**Supplementary Table S7** . Donors characteristics and sample collection information.

| Donors | Sample collection frequency |       | Duration between repeated collection | Age | Sex |
|--------|-----------------------------|-------|--------------------------------------|-----|-----|
|        | Plasma                      | Serum |                                      |     |     |
| 1      | 1                           | 1     | NA                                   | 44  | M   |
| 2      | 1                           | 1     | NA                                   | 44  | M   |
| 3      | 1                           | 1     | NA                                   | 43  | M   |
| 4      | 1                           | 1     | NA                                   | 42  | M   |
| 5      | 1                           | 1     | NA                                   | 53  | M   |
| 6      | 1                           | 1     | NA                                   | 52  | M   |
| 7      | 1                           | 1     | NA                                   | 42  | M   |
| 8      | 1                           | 1     | NA                                   | 52  | M   |
| 9      | 1                           | 1     | NA                                   | 42  | M   |
| 10     | 1                           | 1     | NA                                   | 48  | M   |
| 11     | 2                           | 1     | 12 months                            | 55  | F   |
| 12     | 2                           | 1     | 12 months                            | 53  | M   |
| 13     | 2                           | 1     | 12 months                            | 54  | M   |
| 14     | 1                           | 1     | NA                                   | 57  | M   |
| 15     | 2                           | 1     | 12 months                            | 47  | F   |
| 16     | 2                           | 1     | 13 months                            | 57  | F   |
| 17     | 2                           | 1     | 13 months                            | 55  | F   |
| 18     | 2                           | 1     | 13 months                            | 55  | F   |
| 19     | 1                           | 1     | NA                                   | 36  | F   |

NA, not available



**Supplementary Table S8.** The starting input, spike-in, elution volume and correction factor for comparison among kits.

| Extraction kits                               | Plasma starting volume ( $\mu$ l) | Spike-in amount (fmol) | Elution volume ( $\mu$ l) | Correction factor for Cq |                  |
|-----------------------------------------------|-----------------------------------|------------------------|---------------------------|--------------------------|------------------|
|                                               |                                   |                        |                           | endogenous miRNAs        | exogenous miRNAs |
| miRNeasy Serum/Plasma Kit                     | 200                               | 12.5                   | 25                        | 0                        | 0                |
| miRCURY RNA Isolation Kit - Biofluids         | 200                               | 25                     | 50                        | -1                       | 0                |
| NucleoSpin miRNA Plasma                       | 400                               | 25                     | 50                        | 0                        | 0                |
| Plasma/Serum Circulating RNA Purification kit | 400                               | 25                     | 50                        | 0                        | 0                |
| mirVana PARIS Kit                             | 400                               | 25                     | 100                       | -1                       | -1               |

**Supplementary Table S9.** Details of reverse transcription, preamplification and real-time PCR reaction mixes in all three systems.

| Platform                   | Step                  | Reaction mix                                | Volume (ul)                            |      |
|----------------------------|-----------------------|---------------------------------------------|----------------------------------------|------|
| TaqMan <sup>a</sup>        | Reverse Transcription | 100mM dNTPs                                 | 0.2                                    |      |
|                            |                       | RNase Inhibitor (20 U/μl)                   | 0.15                                   |      |
|                            |                       | 10x Reverse Transcription Buffer            | 1                                      |      |
|                            |                       | MultiScribe™ Reverse Transcriptase (50U/μl) | 1                                      |      |
|                            |                       | RT primers pool <sup>#</sup>                | 3                                      |      |
|                            |                       | RNA sample                                  | 4.65                                   |      |
|                            | Preamplification      | TaqMan PreAmp Master Mix (2x)               | 5                                      |      |
|                            |                       | PreAmp Primer Pool <sup>†</sup>             | 2.5                                    |      |
|                            |                       | Diluted cDNA (1:4)                          | 2.5                                    |      |
|                            | Real-time PCR         | Assay mix                                   | TaqMan miRNA Assay (20X)               | 2.5  |
|                            |                       |                                             | Assay Loading Reagent (2X)             | 2.5  |
|                            |                       | Sample mix                                  | TaqMan Universal Master Mix (2X)       | 2.5  |
| GE Sample Loading Reagent  |                       |                                             | 0.25                                   |      |
| Preamp products (1:5)      |                       |                                             | 2.25                                   |      |
| miRCURY <sup>b</sup>       | Reverse Transcription | 5x Reaction buffer                          | 2                                      |      |
|                            |                       | Nuclease –free water                        | 5                                      |      |
|                            |                       | Enzyme mix                                  | 1                                      |      |
|                            |                       | RNA sample                                  | 2                                      |      |
|                            | Preamplification      | TaqMan PreAmp Master Mix (2x)               | 5                                      |      |
|                            |                       | PreAmp Primer Pool <sup>†</sup>             | 2.5                                    |      |
|                            |                       | Diluted cDNA (1:10)                         | 2.5                                    |      |
|                            | Real-time PCR         | Assay mix                                   | miRCURY forward and reverse primers    | 2.5  |
|                            |                       |                                             | Assay Loading Reagent (2X)             | 2.5  |
|                            |                       | Sample mix                                  | SsoFast EvaGreen Supermix with low ROX | 2.5  |
|                            |                       |                                             | DNA Binding Dye Sample Loading Reagent | 0.25 |
|                            |                       |                                             | Preamp products (1:10)                 | 2.25 |
| miScript <sup>c</sup>      | Reverse Transcription | 10x miScript Nucleics Mix                   | 2                                      |      |
|                            |                       | 5x miScript HiSpec Buffer                   | 4                                      |      |
|                            |                       | miScript Reverse Transcriptase Mix          | 2                                      |      |
|                            |                       | RNA sample                                  | 12                                     |      |
|                            | Preamplification      | 5x miScript PreAMP Buffer                   | 5                                      |      |
|                            |                       | HotStar Taq DNA Polymerase                  | 2                                      |      |
|                            |                       | miScript Primer Assay Mix <sup>§</sup>      | 5                                      |      |
|                            |                       | Nuclease Free Water                         | 7                                      |      |
|                            |                       | miScript PreAMP Universal Primer            | 1                                      |      |
|                            |                       | Diluted cDNA (1:5)                          | 5                                      |      |
|                            |                       | Residual primers removal                    | Side Reaction Reducer                  | 0.7  |
|                            | Real-time PCR         | Assay mix                                   | miScript primers                       | 2.5  |
| Assay Loading Reagent (2X) |                       |                                             | 2.5                                    |      |
| Sample mix                 |                       | SsoFast EvaGreen Supermix with low ROX      | 2.5                                    |      |
|                            |                       | DNA Binding Dye Sample Loading Reagent      | 0.25                                   |      |
|                            |                       | Preamp products (1:5)                       | 2.25                                   |      |

<sup>a</sup>All reagents used are from Life Technologies, except Assay Loading Reagent and GE Sample Loading Reagent from Fluidigm.

<sup>b</sup>Reagents used for RT and all primers are from Exiqon, pre-amp master mix from Life Technologies, Assay Loading Reagent and DNA Binding Dye Sample Loading Reagent from Fluidigm and SsoFast EvaGreen Supermix with low ROX from BioRad.

<sup>c</sup>All reagents used are from Qiagen, except Assay Loading Reagent and DNA Binding Dye Sample Loading Reagent from Fluidigm and SsoFast

<sup>#</sup>RT Primer Pools consist of equal volume of 16 TaqMan RT primers (5X) diluted 1:2

<sup>†</sup>PreAmp Primer Pools consist of 16 TaqMan primers with a final concentration of 0.2 X

<sup>‡</sup>PreAmp Primer Pools consist of 16 miRCURY forward and reverse primers diluted 1:100

<sup>§</sup>miScript PreAmp Primer Mix consist of 16 miScript primers diluted to a final concentration of 0.4 X

**Supplementary Table S10.** Thermal cycling conditions for reverse transcription, pre-amplification, residual primers removal and real-time PCR.

| <b>Platforms</b>    | <b>Steps</b>             | <b>Cycles</b>         | <b>Temperature</b>  | <b>Time</b>     |
|---------------------|--------------------------|-----------------------|---------------------|-----------------|
| <b>TaqMan</b>       | Reverse Transcription    | Hold                  | 16°C                | 30 minutes      |
|                     |                          | Hold                  | 42°C                | 30 minutes      |
|                     |                          | Hold                  | 85°C                | 5 minutes       |
|                     |                          | Hold                  | 4°C                 | ∞               |
|                     | Preamplification         | Hold                  | 95°C                | 10 minutes      |
|                     |                          | 16 cycles             | 95°C                | 15 seconds      |
|                     |                          |                       | 60°C                | 4 minutes       |
|                     | Real-time PCR            | Hold                  | 50°C                | 2 minutes       |
|                     |                          | Hold                  | 95°C                | 10 minutes      |
|                     |                          | 40 cycles             | 95°C                | 15 seconds      |
|                     |                          |                       | 60°C                | 1 minutes       |
|                     |                          |                       |                     |                 |
| <b>miRCURY</b>      | Reverse Transcription    | Hold                  | 42°C                | 60 minutes      |
|                     |                          | Hold                  | 95°C                | 5 minutes       |
|                     |                          | Hold                  | 4°C                 | ∞               |
|                     | Preamplification         | Hold                  | 95°C                | 10 minutes      |
|                     |                          | 16 cycles             | 95°C                | 15 seconds      |
|                     |                          |                       | 60°C                | 4 minutes       |
|                     | Real-time PCR            | Hold                  | 50°C                | 2 minutes       |
|                     |                          | Hold                  | 95°C                | 10 minutes      |
|                     |                          | 40 cycles             | 95°C                | 15 seconds      |
|                     |                          |                       | 60°C                | 1 minutes       |
|                     |                          |                       | Melt Curve Analysis | 60°C            |
|                     |                          |                       | 60°C - 95°C         | 1°C / 3 seconds |
| <b>miScript</b>     |                          | Reverse Transcription | Hold                | 37°C            |
|                     | Hold                     |                       | 95°C                | 5 minutes       |
|                     | Hold                     |                       | 4°C                 | ∞               |
|                     | Preamplification         | Hold                  | 95°C                | 15 minutes      |
|                     |                          | 12 cycles             | 94°C                | 30 seconds      |
|                     |                          |                       | 60°C                | 3 minutes       |
|                     | Residual primers removal | Hold                  | 37°C                | 15 minutes      |
|                     |                          | Hold                  | 95°C                | 5 minutes       |
|                     | Real-time PCR            | Hold                  | 50°C                | 2 minutes       |
|                     |                          | Hold                  | 95°C                | 10 minutes      |
|                     |                          | 40 cycles             | 95°C                | 15 seconds      |
|                     |                          |                       | 60°C                | 1 minutes       |
| Melt Curve Analysis |                          |                       | 60°C                | 3 seconds       |
|                     |                          | 60°C - 95°C           | 1°C / 3 seconds     |                 |

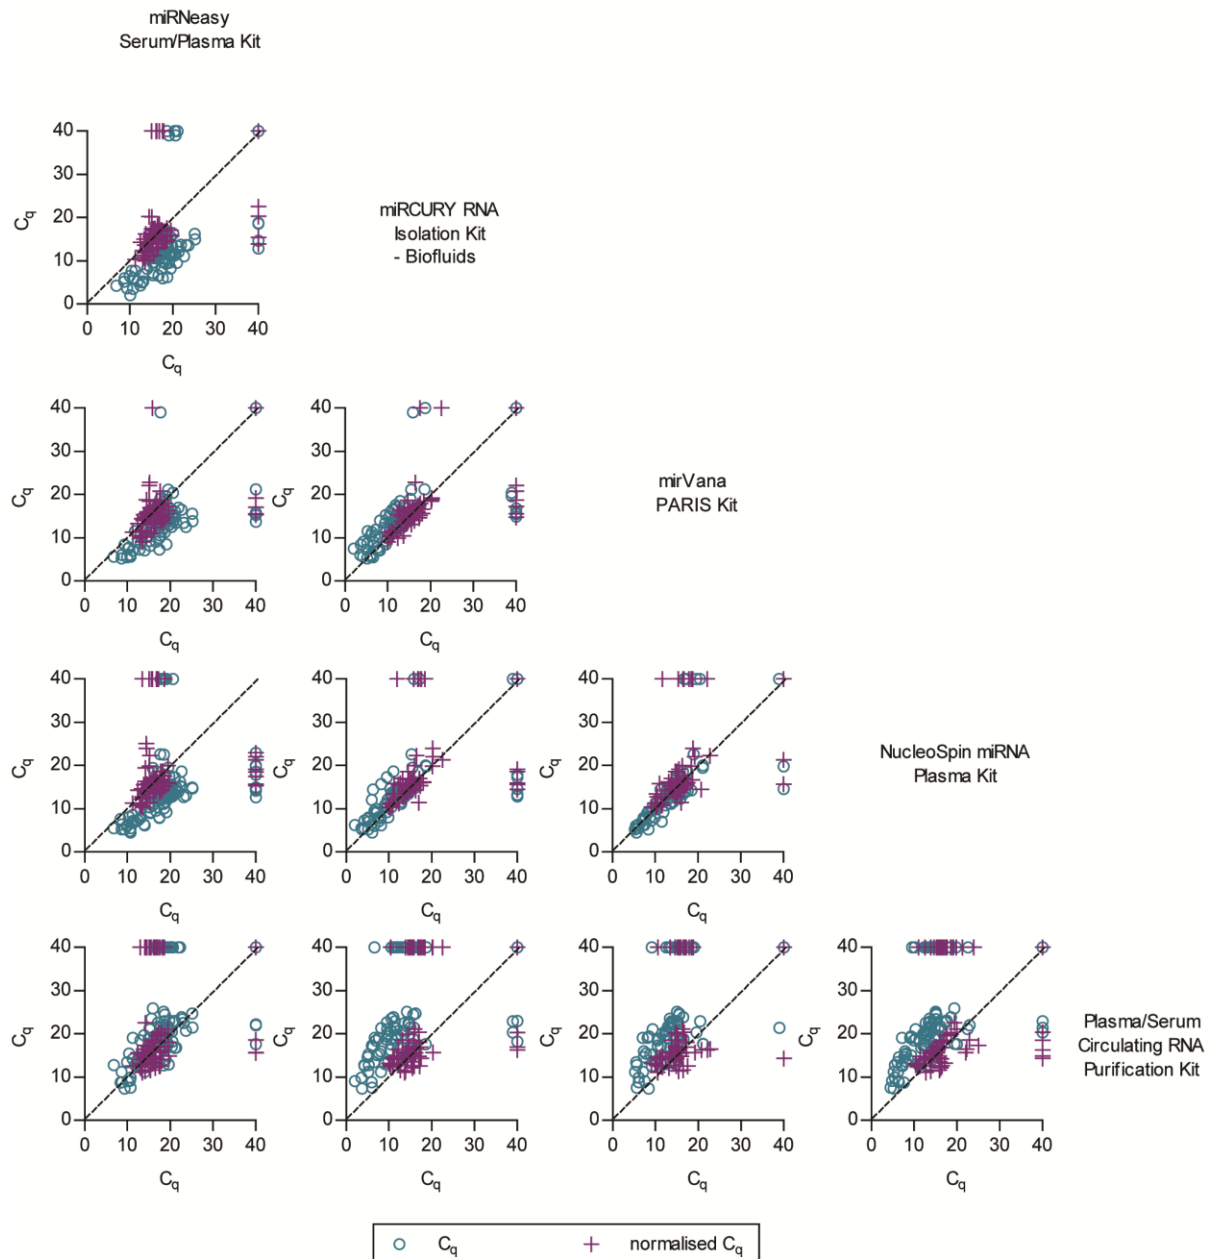

**Supplementary Figure S1.** The effects of extraction kits on RT-qPCR results were evaluated using the miScript system. Pairwise comparison of extraction kits is shown in scatter plots. Each data point represents the average  $C_q$  value obtained from duplicate or triplicate wells of qPCR. Our results indicated that the correlation of data from samples extracted using different kits can be improved by normalization to spike-in controls.

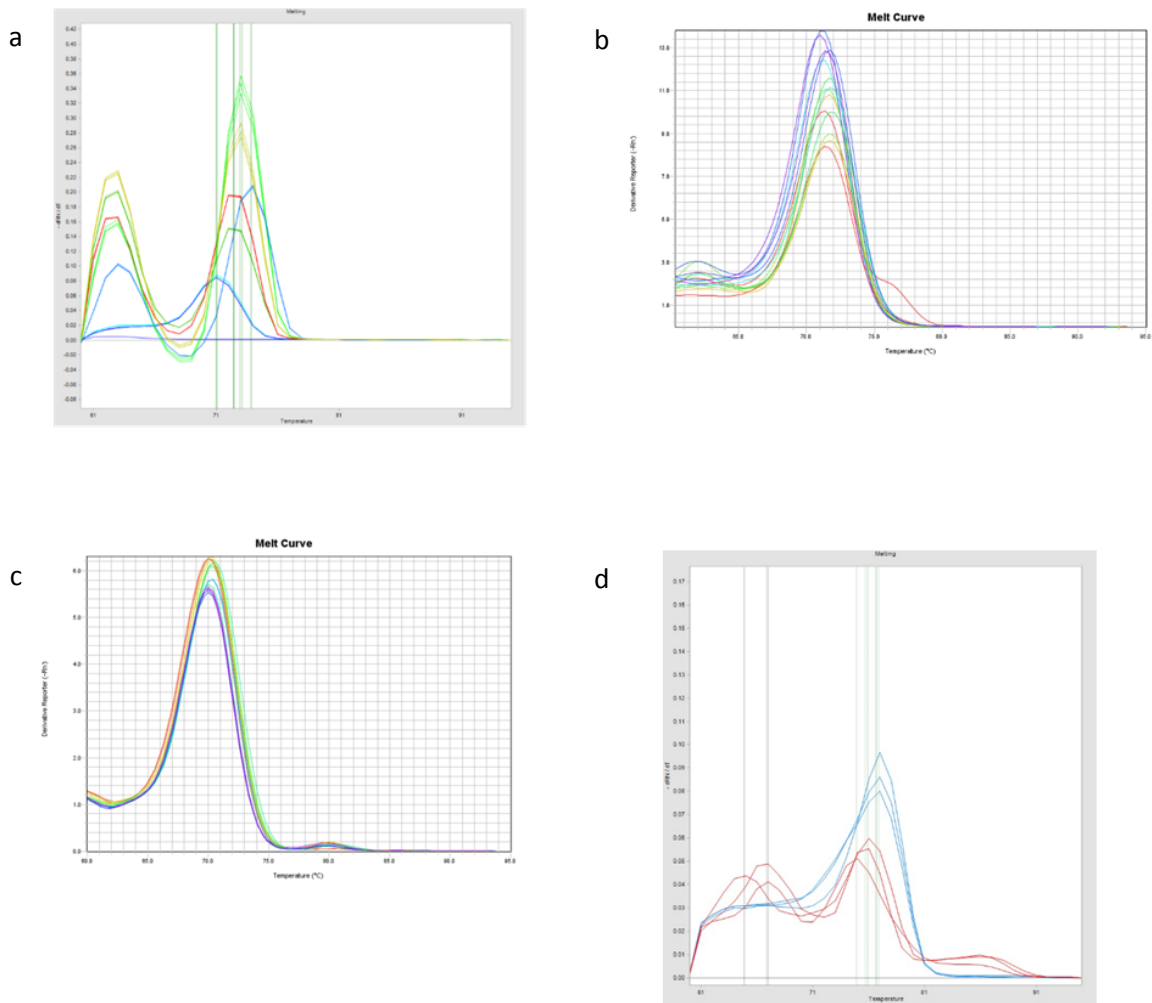

**Supplementary Figure S2.** Melt curves of RT-qPCR samples in different platforms. miRCURY's miR-16 was assayed in (a) preamplified samples, qPCR run on BioMark, Fluidigm (b) preamplified samples, qPCR run on ABI 7500 Fast Real Time PCR, and (c) non-preamplified samples, qPCR run on ABI 7500 Fast Real Time PCR. This assay failed quality control threshold when the preamplification step was applied and ran on BioMark, Fluidigm. (d) Melt curve of triplicates of two samples assayed for miScript's miR-141. One of the samples had fail-melt curve (red) and hence the  $C_q$  value assigned to 40.
